# Supplementary material for: D-Dimer-Driven Anticoagulation Reduces Mortality in Intubated COVID-19 Patients: A Cohort Study With a Propensity-Matched Analysis
Source: PubMed Central journal article supplement (PMC7902033; doi:10.3389/fmed.2021.631335), 2021-02-04
Supplement: Image_1.pdf [file Image_1.pdf]

SUPPLEMENTAL MATERIAL

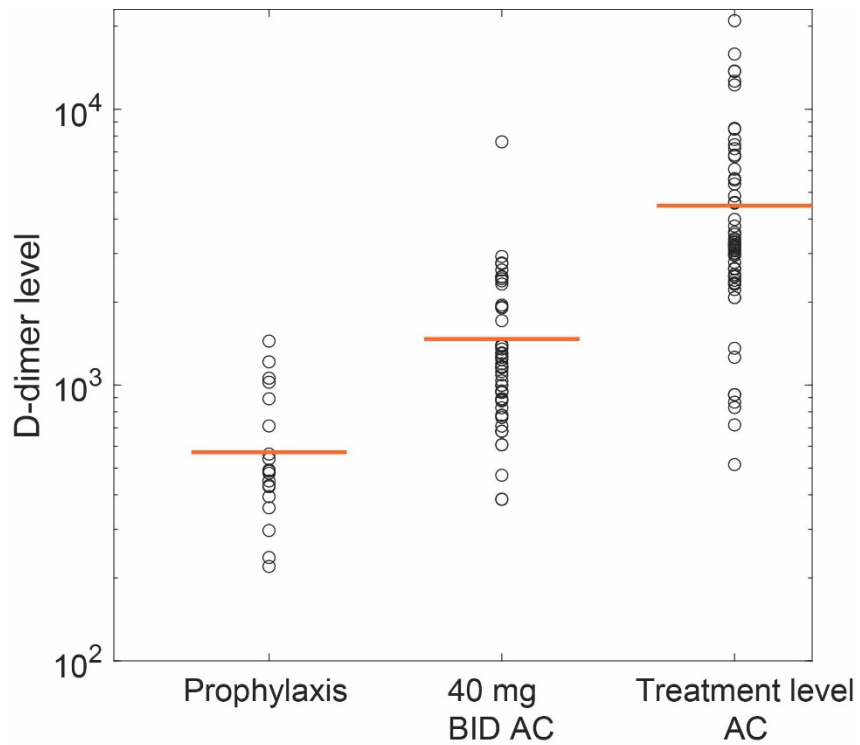

**Supplementary Figure 1.** Measured D-dimer level of ON-protocol patients corresponding to the start of the protocol. The average D-dimer level for ON-protocol groups that were administered with prophylaxis was 570.88 (SE=68.7), those who were administered with 40mg BID 1492 (SE=167) and the treatment level 4728(SE=515).

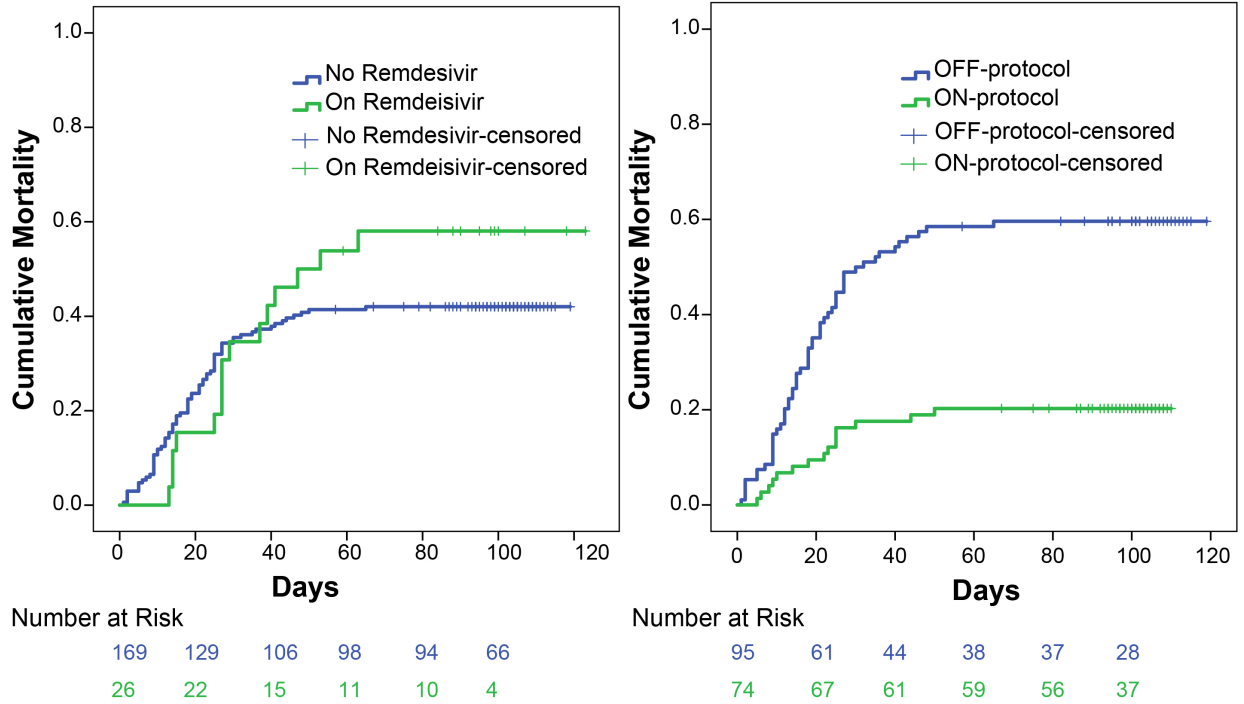

**Supplementary Figure 2. Administration of remdesivir in our patient population did not affect mortality. A)** In the studied patient population 26/195 (13.3%) received remdesivir, including nine patients (8.6%) OFF-protocol and 17 patients (18.6%) ON-protocol. 57% of patients who got remdesivir died, as opposed to 44% overall mortality of all patients. There was no statistically significant difference in the mortality of patients who received remdesivir, (log rank,  $P=0.362$ ). **B)** Excluding the subgroup of patients (26/195) who received remdesivir did not affect the overall result of our study. The ON-protocol group still had substantially lower mortality than the OFF-protocol group (overall mortality 20.27% versus 59.57%,  $P<0.0001$ ).

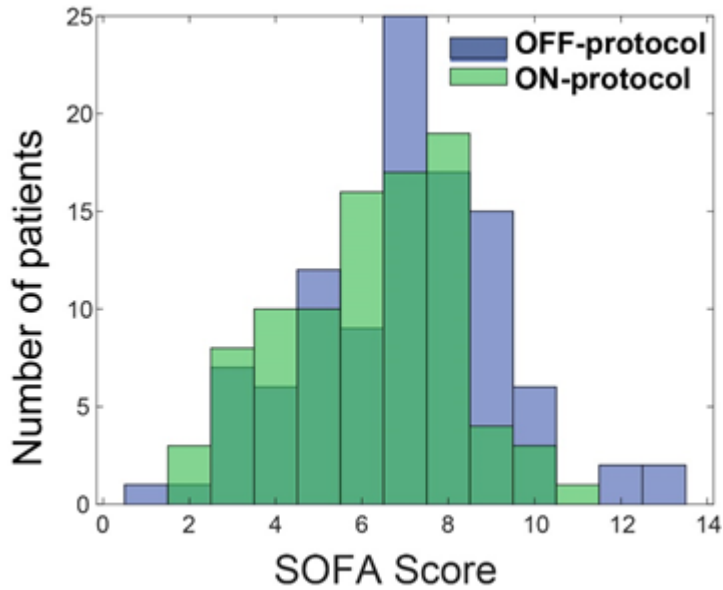

**Supplementary Figure 3.** SOFA Scores for ON-protocol and OFF-protocol groups are in similar ranges.

**Supplementary Table 1.** The Medication list for ON- protocol and OFF-protocol groups.

| Medication         | ON-protocol | OFF-protocol | <i>P</i> value |
|--------------------|-------------|--------------|----------------|
| Hydroxychloroquine | 80(87.91)   | 94(90.38)    | 0.57           |
| All steroids       | 77(84.61)   | 96(92.3)     | 0.09           |
| Dexamethasone      | 3(3.29)     | 8(7.6)       | 0.18           |
| Hydrocortisone     | 17(18.68)   | 27(25.96)    | 0.22           |
| Methylprednisolone | 77(84.61)   | 85(81.73)    | 0.59           |
| Prednisone         | 38(41.75)   | 33(31.73)    | 0.14           |
| Remdesivir         | 17(18.68)   | 9(8.65)      | 0.039          |
| Tocilizumab        | 34(37.36)   | 41(39.42)    | 0.76           |
